# Supplementary material for: Double-strand break repair deficiency in NONO knockout murine embryonic fibroblasts and compensation by spontaneous upregulation of the PSPC1 paralog
Source: PubMed Central journal article supplement — Nucleic Acids Res. 2014 Aug 6;42(15):9771–80. doi: 10.1093/nar/gku650 (PMC4150768; doi:10.1093/nar/gku650), 2014-08-06
Supplement: supp_gku650_nar-01134-f-2014-File008.pdf [file supp_gku650_nar-01134-f-2014-File008.pdf]

**Double strand break repair deficiency in NONO knockout murine embryonic fibroblasts and compensation by spontaneous up-regulation of the PSPC1 paralog**

Shuyi Li<sup>1,2,3</sup>, Zhentian Li<sup>1,2,3</sup>, Fengjue Shu<sup>1</sup>, Hairong Xiong<sup>3,4</sup>, Andrew C. Phillips<sup>3,†</sup>, and William S. Dynan<sup>1,2,3,\*</sup>

<sup>1</sup>Department of Radiation Oncology, Emory University, Atlanta, GA 30322, USA,

<sup>2</sup>Department of Biochemistry, Emory University, Atlanta, GA 30322, USA,

<sup>3</sup>Institute of Molecular Medicine and Genetics, Georgia Regents University, Augusta, GA 30912 USA,

<sup>4</sup>State Key Laboratory of Virology/Institute of Medical Virology, Wuhan University, Wuhan, China. 430071

<sup>†</sup>Present address: Abbvie, North Chicago, Illinois 60064-6098, USA.

## SUPPLEMENTARY FIGURES

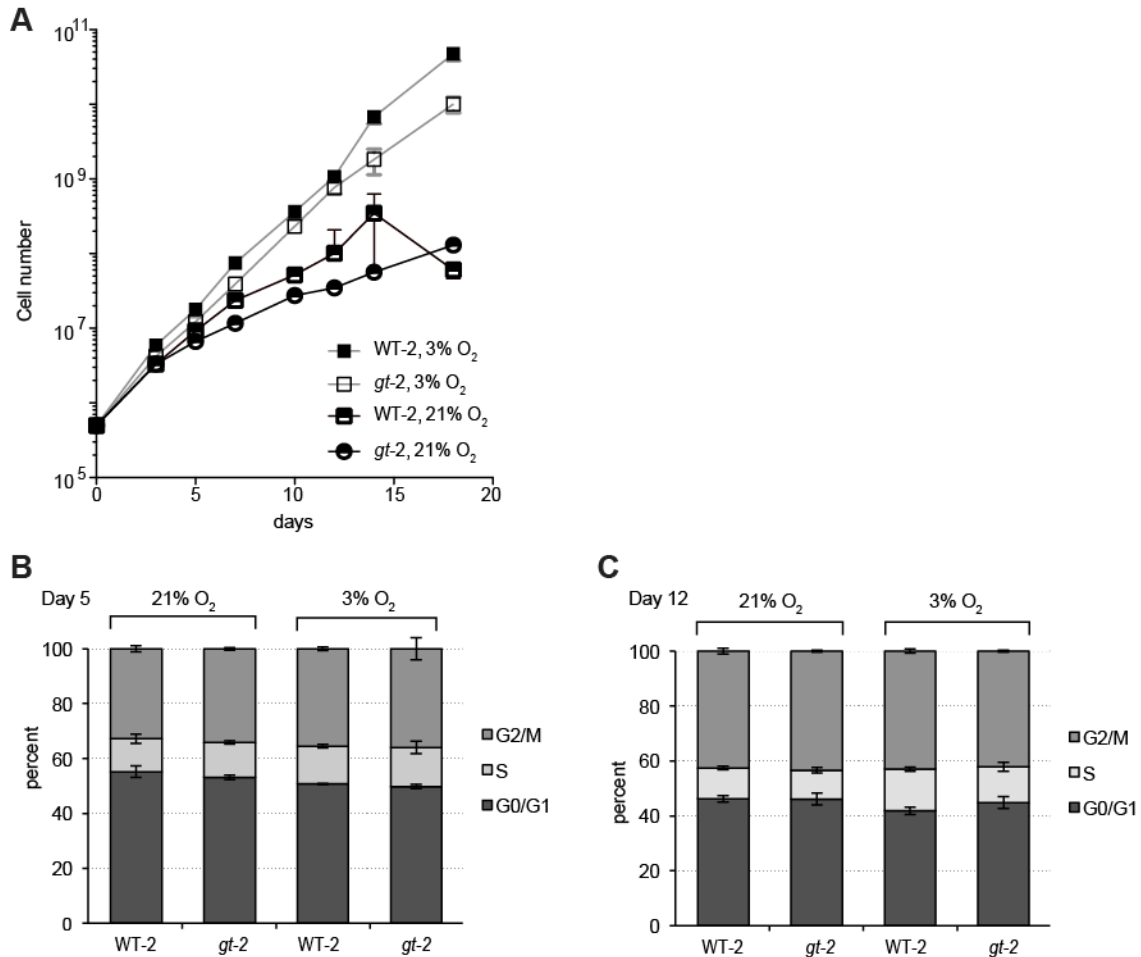

**Figure S1.** Effect of NONO deficiency on cell growth under 3% O<sub>2</sub> and atmospheric (21%) O<sub>2</sub>. Cells were thawed and allowed to recover in a 3% O<sub>2</sub>/5% CO<sub>2</sub> atmosphere. Replicate sub-cultures were prepared and one set of duplicates was returned for growth in 3% O<sub>2</sub>/5% CO<sub>2</sub> and the other was transferred to a standard air/5% CO<sub>2</sub> atmosphere. A. Growth curves. Cells were harvested, counted, and re-plated every 2-4 days as indicated. Each point represents the mean of two or more replicate cultures. Error bars denote standard deviation. B. C. Cell cycle distributions were determined by flow cytometry using propidium iodide staining as described for Figure 2 of the main text. Cells were analyzed on day 5 (panel B) or day 12 (panel C).

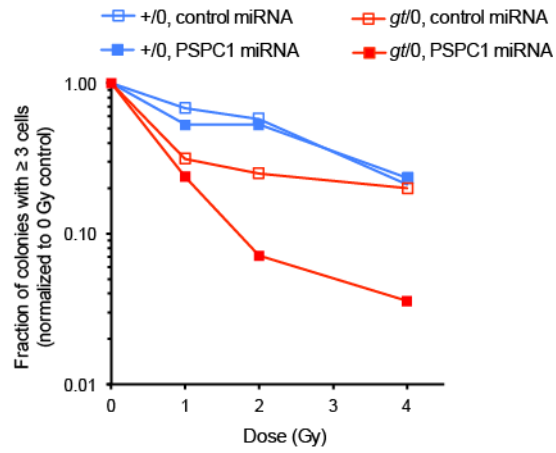

**Figure S2.** Green cell microcolony formation assay. Same experiment as Figure 4 of the main text except that colonies of  $\geq 3$  cells were scored. Data are expressed as a proportion of colonies of  $\geq 3$  cells relative to total colonies, normalized to non-irradiated control group. For each genotype and radiation dose, 200 green microcolonies were scored.

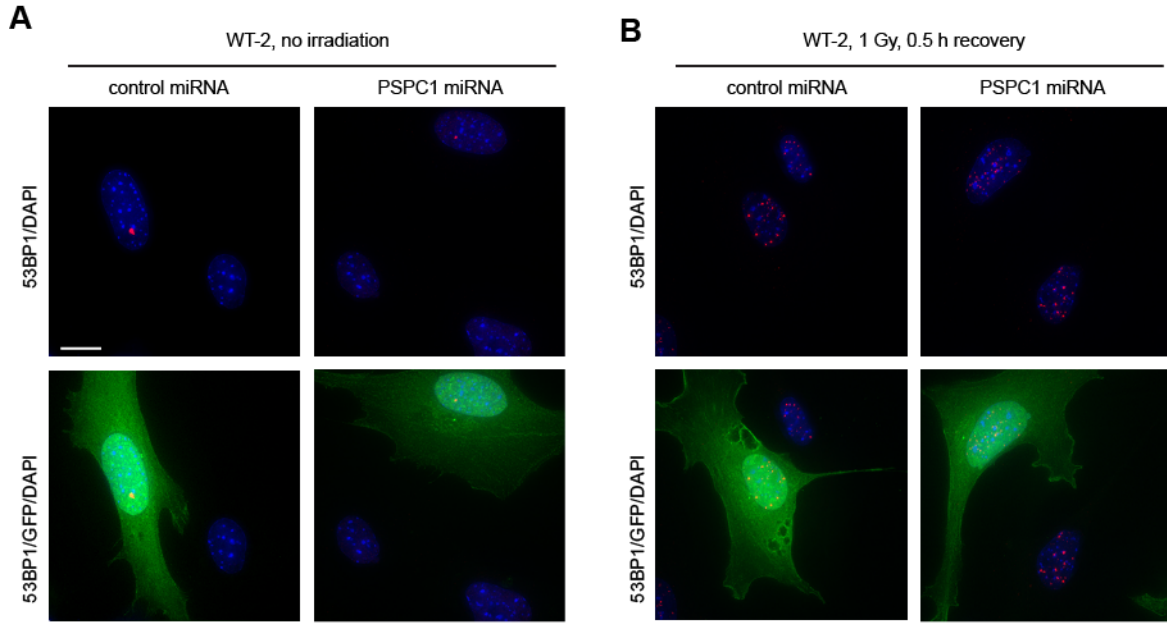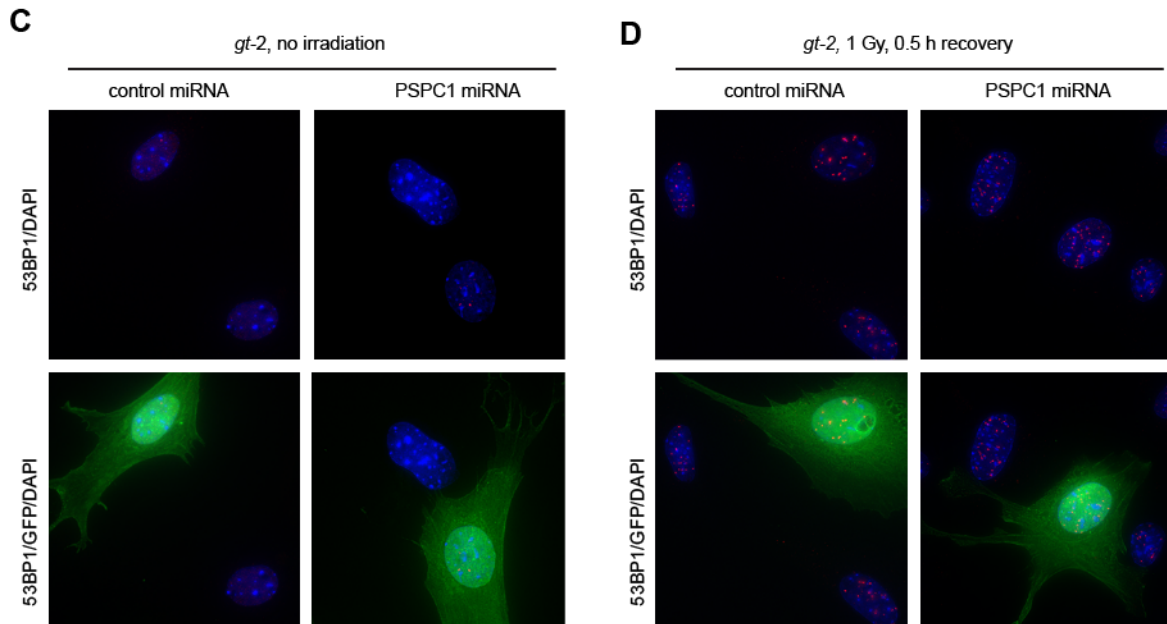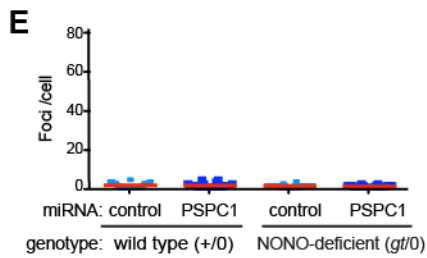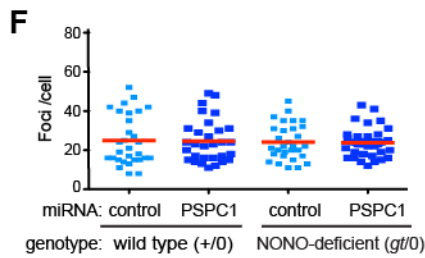

**Figure S3.** Formation of 53BP1 foci. Vectors encoding control or PSPC1 miRNA were introduced by electroporation into wild type (+/0) or NONO-deficient (*gt/0*) MEFs. Cells were mock irradiated or exposed to 1 Gy of  $^{137}\text{Cs}$   $\gamma$ -rays. At indicated times following irradiation, cells were fixed and analyzed by indirect immunofluorescence using anti-53BP1 primary, red secondary antibody, and DAPI counterstain. A-D. Representative fields showing 53BP1/DAPI channels (top row) or 53BP1/GFP/DAPI merged images for indicated experimental groups. Scale bar denotes 10  $\mu\text{m}$ . E.F. Foci per cell in indicated experimental groups. A total of 30 nuclei were scored per experimental group. Blue symbols depict score for individual cells; red bar depicts mean. Note that 53BP1 foci were equivalently induced in all experimental groups after 1 Gy radiation and 30 min recovery.
